# Supplementary material for: Electrocatalytic valorization of 5-hydroxymethylfurfural coupled with hydrogen production using tetraruthenium-containing polyoxometalate-based composites
Source: Royal Society of Chemistry journal article supplement (doi:10.1039/d2ta02148j), 2022-01-01
Supplement: d2ta02148j1.pdf [file d2ta02148j1.pdf]

## SUPPORTING INFORMATION

### Electrocatalytic Valorization of 5-Hydroxymethylfurfural Coupling with Hydrogen Production by Tetraruthenium- Containing Polyoxometalate-based Composite

Hui Zhou,<sup>a</sup> Yuanyuan Dong,<sup>\*a</sup> Xing Xin,<sup>a</sup> Manzhou Chi,<sup>a</sup> Tinglu Song,<sup>b</sup> and Hongjin Lv<sup>\*a</sup>

<sup>a</sup> MOE Key Laboratory of Cluster Science, School of Chemistry and Chemical Engineering,  
Beijing Institute of Technology, Beijing 102488, P. R. China.

<sup>b</sup> Experimental Center of Advanced Materials School of Materials Science & Engineering ,  
Beijing Institute of Technology.

#### Table of content

##### 1. Figure S1-S13

|                                                                                                                                                      |   |
|------------------------------------------------------------------------------------------------------------------------------------------------------|---|
| <b>Figure S1.</b> Optical photo of the aqueous solution of the <b>Ru<sub>4</sub></b> -containing residue after TG analysis. ....                     | 3 |
| <b>Figure S2.</b> SEM image of <b>Ru<sub>4</sub></b> /PEI-rGO. ....                                                                                  | 3 |
| <b>Figure S3.</b> Energy-dispersive X-ray (EDX) elements analysis of <b>Ru<sub>4</sub></b> /PEI-rGO. ....                                            | 3 |
| <b>Figure S4.</b> The survey XPS spectra of <b>Ru<sub>4</sub></b> and <b>Ru<sub>4</sub></b> /PEI-rGO. ....                                           | 4 |
| <b>Figure S5.</b> HPLC spectra of the anode oxidation products for <b>Ru<sub>4</sub></b> /PEI-rGO electrocatalysts. ....                             | 4 |
| <b>Figure S6.</b> GC spectra of air and the gas products at anode chambers for rGO and PEI-rGO electrocatalysts. ....                                | 5 |
| <b>Figure S7.</b> The electrocatalytic activities of <b>Ru<sub>4</sub></b> /PEI-rGO with the variation in the amount of <b>Ru<sub>4</sub></b> . .... | 5 |
| <b>Figure S8.</b> CV curves of <b>Ru<sub>4</sub></b> homogeneous aqueous solution in pH 6 without and with HMF. ....                                 | 6 |

|                                                                                                                                                                                                                                      |   |
|--------------------------------------------------------------------------------------------------------------------------------------------------------------------------------------------------------------------------------------|---|
| <b>Figure S9.</b> CV curves of <b>Ru<sub>4</sub></b> homogeneous aqueous solution in pH 4 without and with HMF. ....                                                                                                                 | 6 |
| <b>Figure S10.</b> CV curves of <b>Ru<sub>4</sub></b> homogeneous aqueous solution in pH 8 without and with HMF. ....                                                                                                                | 7 |
| <b>Figure S11.</b> The high resolution (a) C 1s + Ru 3d, (b) O 1s XPS spectra of fresh <b>Ru<sub>4</sub></b> /PEI-rGO electrocatalyst. ....                                                                                          | 7 |
| <b>Figure S12.</b> The high resolution Ru 3p XPS spectra of <b>Ru<sub>4</sub></b> /PEI-rGO after reaction over 6 h at applied voltage of 0.6 V and 0.8 V at pH 6 electrolyte solution, and pH 4 and pH 8 electrolyte at 0.94 V. .... | 8 |
| <b>Figure S13.</b> The plots of the conversion of HMF and the yields of furanic products versus the electrolysis time at applied voltage of 0.94 V under pH 6 electrolyte solution with 0.6 eq. TEMPO additive. ....                 | 8 |
| <b>Figure S14.</b> I-t response curve for <b>Ru<sub>4</sub></b> /PEI-rGO electrocatalyst at applied voltage of 0.94 V for 12 hours under pH 6 electrolyte solution. ....                                                             | 9 |
| <b>Figure S15.</b> SEM and TEM images of <b>Ru<sub>4</sub></b> /PEI-rGO after bulk electrolysis for 12 hours. ....                                                                                                                   | 9 |

## 2. Table S1-S2

|                                                                                                                                                                                           |    |
|-------------------------------------------------------------------------------------------------------------------------------------------------------------------------------------------|----|
| <b>Table S1.</b> The electrocatalytic activities of <b>Ru<sub>4</sub></b> /PEI-rGO catalysts with the different amount of PEI. ....                                                       | 9  |
| <b>Table S2.</b> The electrocatalytic activities of <b>Ru<sub>4</sub></b> /PEI-rGO catalysts with the different loading quantity of the composite electrocatalyst onto carbon cloth. .... | 10 |
| <b>Table S3.</b> Comparison of the electrocatalytic oxidation of HMF to DFF using different noble metal-based electrocatalysts. ....                                                      | 10 |

## 1. Figure S1-S13

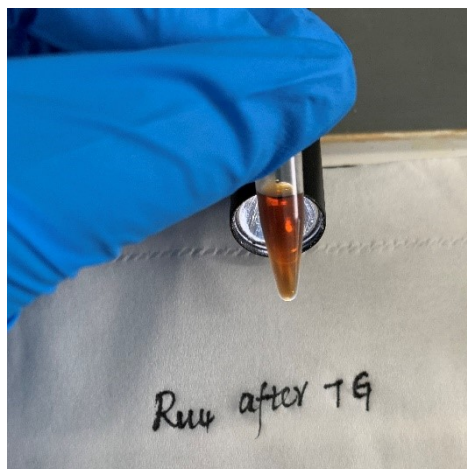

Figure S1 Optical photo of the aqueous solution of the **Ru<sub>4</sub>**-containing residue after TG analysis.

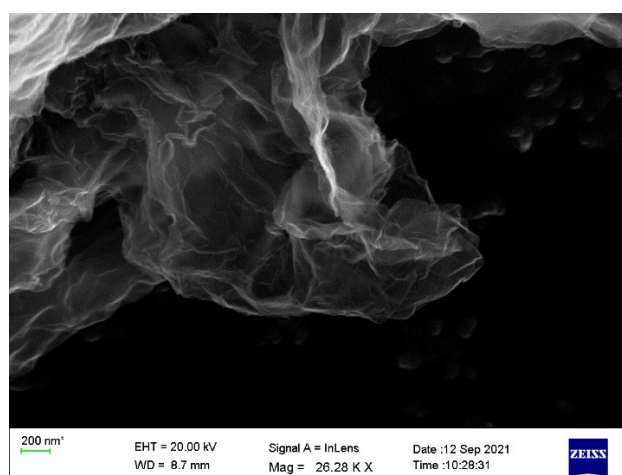

Figure S2 SEM image of **Ru<sub>4</sub>**/PEI-rGO.

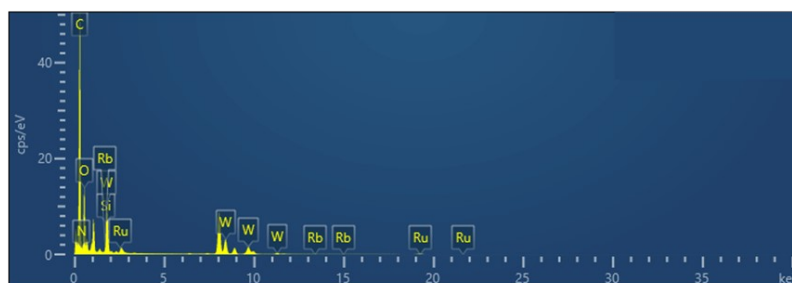

Figure S3 Energy-dispersive X-ray (EDX) elements analysis of **Ru<sub>4</sub>**/PEI-rGO.

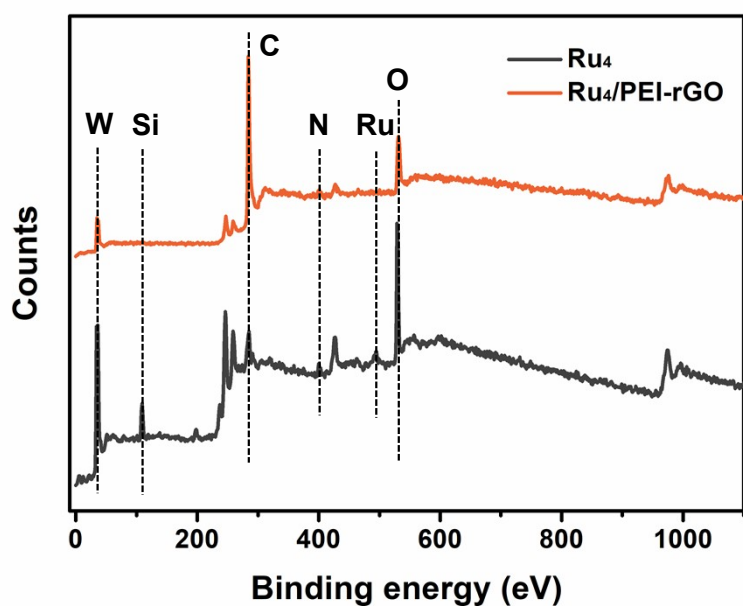

Figure S4 The survey XPS spectra of **Ru<sub>4</sub>** and **Ru<sub>4</sub>/PEI-rGO**.

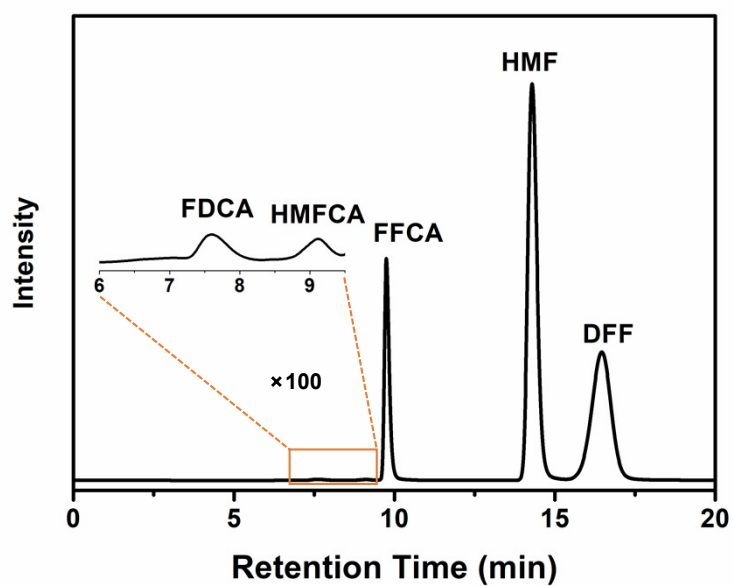

Figure S5 HPLC spectra of the anode oxidation products for **Ru<sub>4</sub>/PEI-rGO** electrocatalysts.

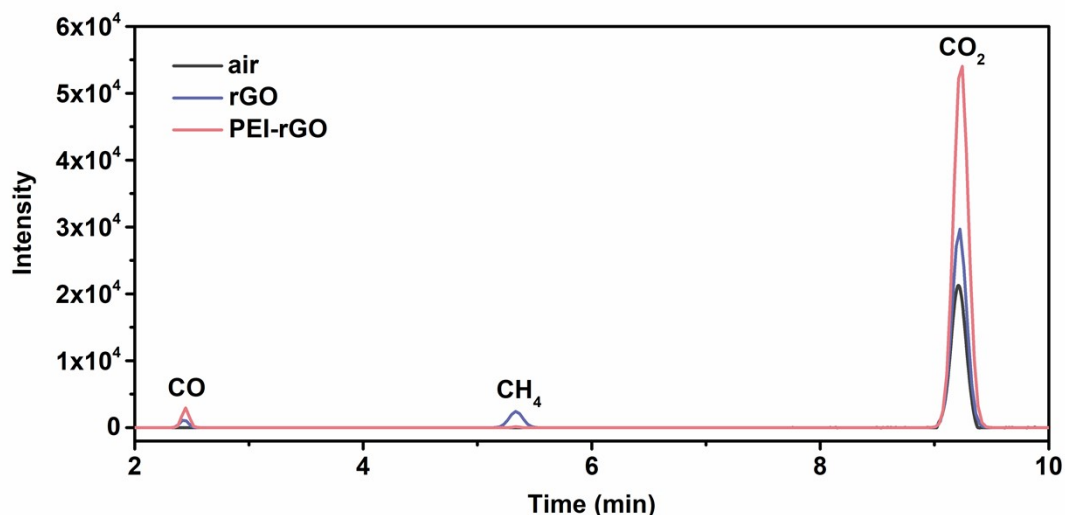

Figure S6 GC spectra of air and the gas products at anode chambers for rGO and PEI-rGO electrocatalysts.

Upon 6-hour bulk electrocatalysis for rGO and PEI-rGO, the gaseous products at the anode chambers was tested using GC. The results indicated that there were large amount of  $\text{CO}_2$  and small amount of  $\text{CO}/\text{CH}_4$ , which fully confirmed the deep mineralization of HMF during bulk electrocatalysis for rGO and PEI-rGO electrocatalysts.

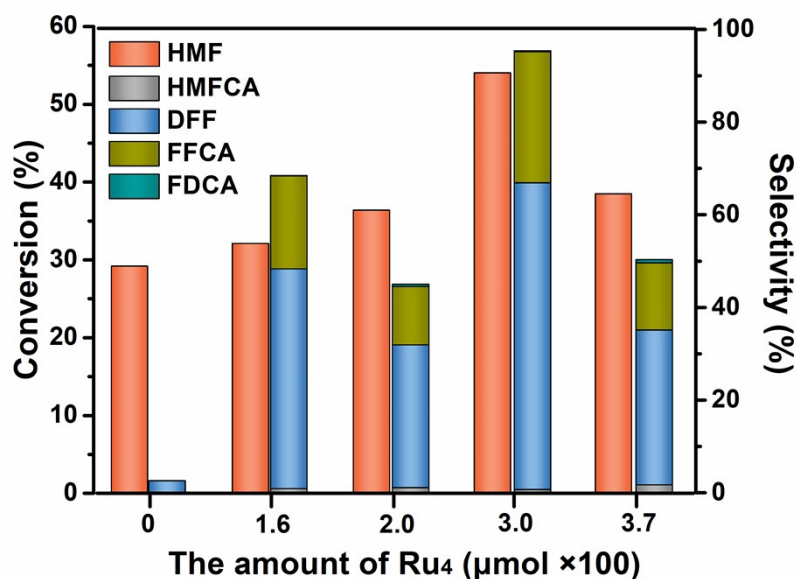

Figure S7 The electrocatalytic activities of  $\text{Ru}_4/\text{PEI-rGO}$  with the variation in the amount of  $\text{Ru}_4$ .

The amounts of  $\text{Ru}_4$  for  $\text{Ru}_4/\text{PEI-rGO}$  electrocatalysts were determined by ICP. With the amount of  $\text{Ru}_4$  increasing, the conversion of HMF and the selectivity of oxidation products displayed the shape of volcano. The optimized amount of  $\text{Ru}_4$  is  $0.03 \mu\text{mol}$ , corresponding to the concentration of  $\text{Ru}_4$  aqueous solution of  $1 \text{ mg/mL}$ .

during the preparation described in experimental section.

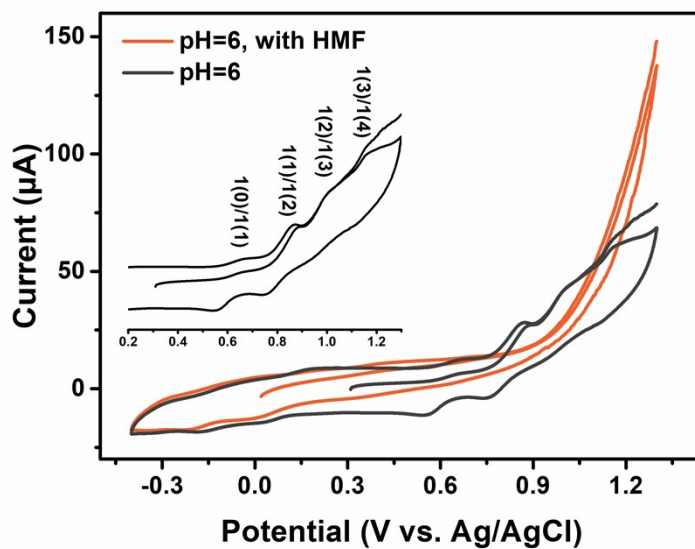

Figure S8 CV curves of  $\text{Ru}_4$  homogeneous aqueous solution in pH 6 without and with HMF.

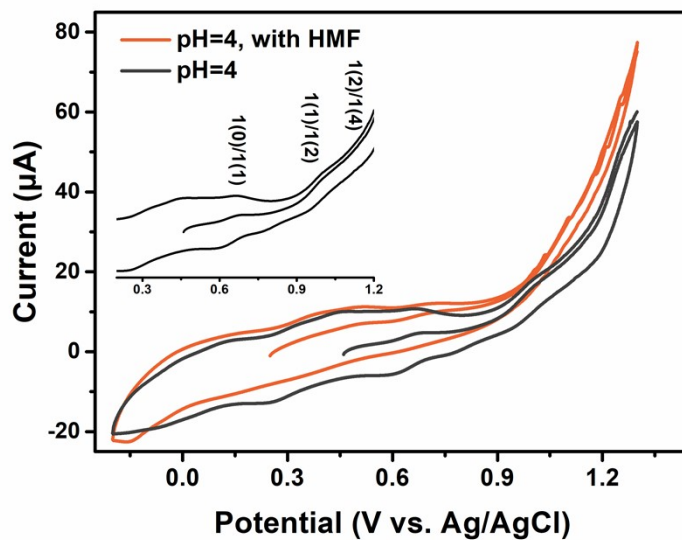

Figure S9 CV curves of  $\text{Ru}_4$  homogeneous aqueous solution in pH 4 without and with HMF.

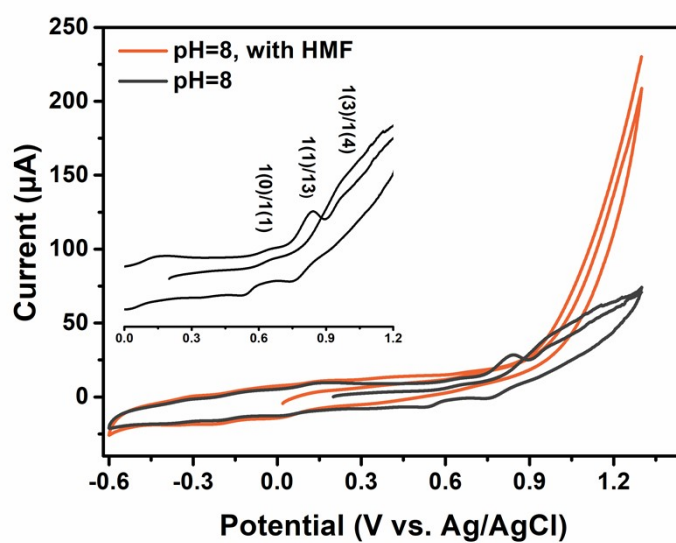

Figure S10 CV curves of **Ru<sub>4</sub>** homogeneous aqueous solution in pH 8 without and with HMF.

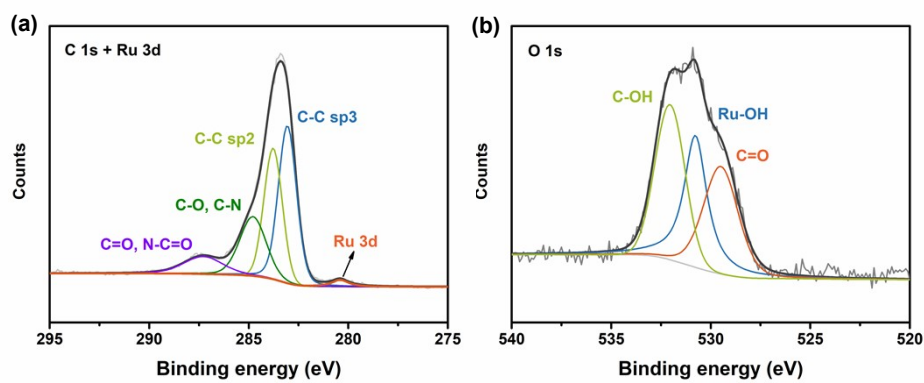

Figure S11 The high resolution (a) C 1s + Ru 3d, (b) O 1s XPS spectra of fresh **Ru<sub>4</sub>**/PEI-rGO electrocatalyst.

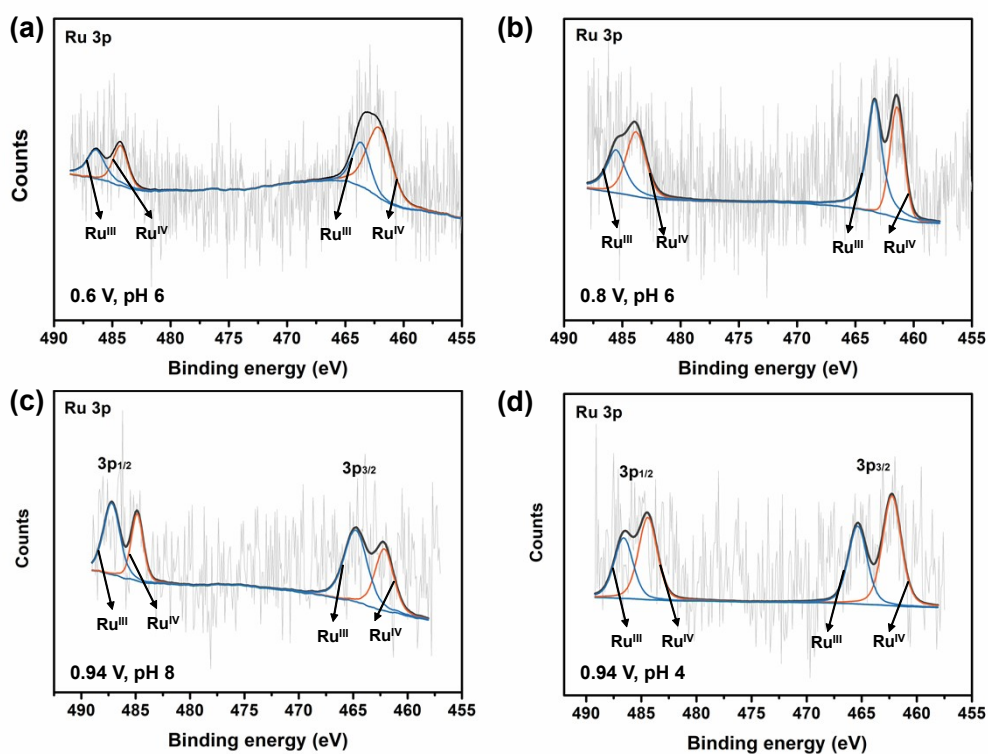

Figure S12 The high resolution XPS spectra of **Ru<sub>4</sub>**/PEI-rGO after reaction over 6-hour at applied voltage of (a) 0.6 V and (b) 0.8 V at pH 6 electrolyte solution, and (c) pH 8 and (d) pH 4 electrolyte at 0.94 V.

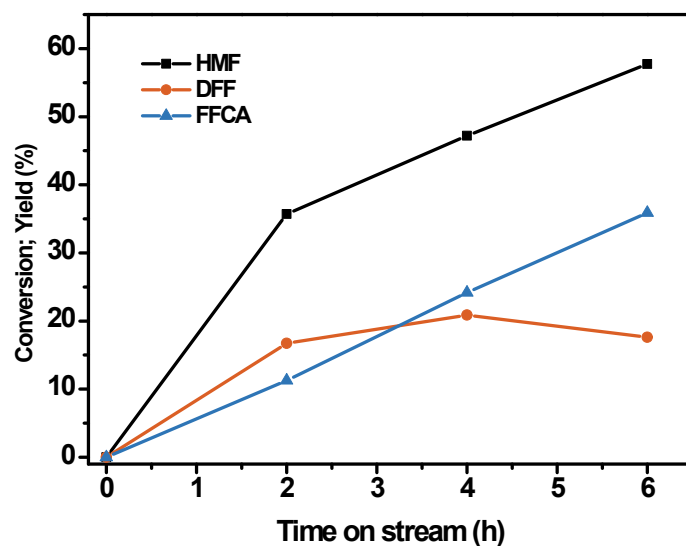

Figure S13 The plots of the conversion of HMF and the yields of furanic products versus the electrolysis time at applied voltage of 0.94 V under pH 6 electrolyte solution with 0.6 eq. TEMPO additive.

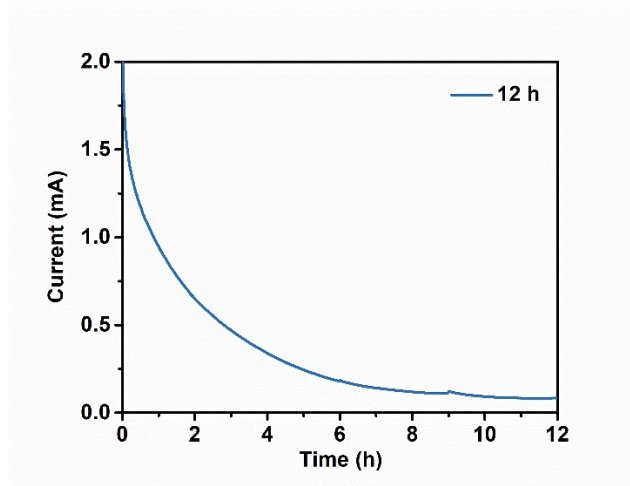

Figure S14 I-t response curve for **Ru<sub>4</sub>**/PEI-rGO electrocatalyst at applied voltage of 0.94 V for 12 hours under pH 6 electrolyte solution.

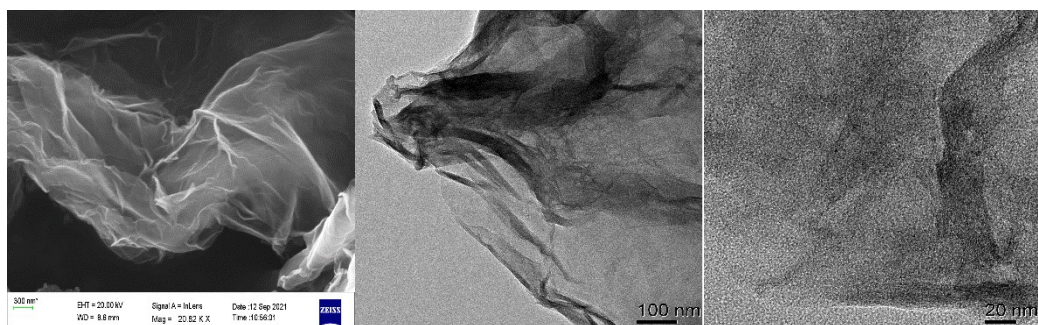

Figure S15 SEM (a) and TEM (b-c) images of **Ru<sub>4</sub>**/PEI-rGO after bulk electrolysis for 12 hours.

## 2. Table S1-S2

Table S1 The electrocatalytic activities of **Ru<sub>4</sub>**/PEI-rGO catalysts with the different amount of PEI.

| C <sub>PEI</sub> <sup>a</sup><br>(mg/mL) | HMF   | HMFCA |       | DFF   |        | FFCA  |        | FDCA  |       |
|------------------------------------------|-------|-------|-------|-------|--------|-------|--------|-------|-------|
|                                          | Con.  | Yie.  | Sel.  | Yie.  | Sel.   | Yie.  | Sel.   | Yie.  | Sel.  |
| 0                                        | 16.4% | 0.80% | 4.90% | 3.66% | 22.39% | 1.88% | 11.48% | 0.36% | 2.18% |
| 4                                        | 22.4% | 1.26% | 5.62% | 3.46% | 15.49% | 1.56% | 6.97%  | 0.24% | 1.07% |
| 10                                       | 13.0% | 0.63% | 4.86% | 0.99% | 7.57%  | 0.40% | 3.07%  | -     | -     |
| 50                                       | 5.2%  | 0.38% | 7.32% | 1.52% | 29.12% | 0.22% | 4.26%  | -     | -     |

Conditions: 0.5 M HAC/NaAc buffer solution (pH 6, 40 ml), HMF (5 mM), **Ru<sub>4</sub>**/PEI-rGO catalysts (0.5 mg) with different amount of PEI, reaction time (2 h), applied potential at 1.5 V vs RHE. <sup>a</sup> The original concentration of the PEI aqueous solution used in the **Ru<sub>4</sub>**/PEI-rGO catalyst preparation process.

Table S2 The electrocatalytic activities of **Ru<sub>4</sub>**/PEI-rGO catalysts with the different loading quantity of the composite electrocatalyst onto carbon cloth.

| Cat. <sup>a</sup><br>(mg) | HMF<br>Con. | HMFCA<br>Yie. Sel. |      | DFF<br>Yie. Sel. |       | FFCA<br>Yie. Sel. |       | FDCA<br>Yie. Sel. |      |
|---------------------------|-------------|--------------------|------|------------------|-------|-------------------|-------|-------------------|------|
| 0.25                      | 31.5%       | 0.3%               | 1.0% | 2.3%             | 7.3%  | 0.5%              | 1.6%  | -                 | -    |
| 0.37                      | 33.6%       | 0.3%               | 1.0% | 5.9%             | 17.4% | 1.4%              | 4.2%  | 0.1%              | 0.2% |
| 0.50                      | 50.8%       | 0.4%               | 0.7% | 33.6%            | 66.2% | 14.4%             | 28.3% | 0.1%              | 0.3% |
| 0.62                      | 35.7%       | 0.3%               | 1.0% | 7.2%             | 20.2% | 2.1%              | 5.8%  | 0.1%              | 0.4% |
| 0.75                      | 42.1%       | 0.5%               | 1.2% | 16.1%            | 38.2% | 6.2%              | 14.8% | 0.3%              | 0.7% |
| 1.00                      | 36.3%       | 0.5%               | 1.6% | 8.2%             | 22.5% | 2.8%              | 7.6%  | 0.2%              | 0.5% |

Conditions: 0.5 M HAc/NaAc buffer solution (pH 6, 20 ml), HMF (5 mM), **Ru<sub>4</sub>**/PEI-rGO catalyst, reaction time (6 h), applied potential at 1.5 V vs RHE. <sup>a</sup> The amount of catalyst used in the electrocatalytic experiment, corresponding to the volumes of **Ru<sub>4</sub>**/PEI-rGO catalyst ink supported by carbon cloth are 50, 75, 100, 125, 150, 200  $\mu$ L.

Table S3 Comparison of the electrocatalytic oxidation of HMF to DFF using different noble metal-based electrocatalysts.

| Catalyst                               | Conditions                                     | Potential<br>(V vs.<br>RHE) | HMF<br>(mM) | HMF<br>Con. (%) | DFF<br>Yie./Sel. (%) | Reaction<br>time (h) | Ref.         |
|----------------------------------------|------------------------------------------------|-----------------------------|-------------|-----------------|----------------------|----------------------|--------------|
| <b>Ru<sub>4</sub></b> /PEI-rGO         | 0.5 M pH=6<br>NaAc/HAc                         | 1.50                        | 5           | 50.8            | 33.6/66.2            | 6                    | This<br>work |
| PtRu                                   | 0.1 M H <sub>2</sub> SO <sub>4</sub> ,<br>50°C | 1.6 V vs.<br>SHE            | 100         | 25.0            | 22.3/89.0            | 17                   | [1]          |
| Pt/Fe <sub>3</sub> O <sub>4</sub> /rGO | 0.1 M K <sub>2</sub> SO <sub>4</sub>           | 0.85 V vs.<br>Ag/AgCl       | 0.5         | 7.2             | 6.8/94.4             | 20                   | [2]          |
| Pt                                     | 1 M H <sub>2</sub> SO <sub>4</sub> ,<br>60°C   | 2.00                        | 20          | 88.3            | 13.1/14.8            | 100 C<br>passed      | [3]          |
| Pb modified-<br>Pt                     | 0.1 M NaOH                                     | 0.90                        | 10          | 100.0           | 50.4/80.0            | 2000 C<br>passed     | [4]          |
| Pt foil                                | 0.1 M NaOH                                     | 2.10                        | 10          | 70.0            | 18.0/25.7            | 12                   | [5]          |

## References

- [1] T. Cao, M. Wu, V. V. Ordonsky, X. Xin, H. Wang, P. Métivier, M. Pera-Titus, *ChemSusChem* **2017**, *10*, 4851-4854.
- [2] C. Zhou, W. Shi, X. Wan, Y. Meng, Y. Yao, Z. Guo, Y. Dai, C. Wang, Y. Yang, *Catalysis Today* **2019**, *330*, 92-100.
- [3] S. R. Kubota, K.-S. Choi, *ChemSusChem* **2018**, *11*, 2138-2145.
- [4] K. B. Kokoh, E. M. Belgsir, *Tetrahedron Letters* **2002**, *43*, 229-231.
- [5] K. R. Vuyyuru, P. Strasser, *Catalysis Today* **2012**, *195*, 144-154.
